# Supplementary material for: An improved method to generate secondary nanoplastics and oligomers: application in ecotoxicology
Source: Royal Society of Chemistry journal article supplement (doi:10.1039/d4en00866a), 2024-12-23
Supplement: d4en00866a1.pdf [file d4en00866a1.pdf]

## Supplementary Material

### **An Improved method to generate secondary nanoplastics and oligomers: Application in ecotoxicology**

Silvia Gómez-Kong<sup>1Δ</sup>, Miguel Tamayo-Belda<sup>1Δ</sup>, Gerardo Pulido-Reyes<sup>1</sup>, Carlos Edo<sup>2</sup>, Irene Verdú<sup>1</sup>, Francisco Leganés<sup>1,3</sup>, Roberto Rosal<sup>2</sup>, Miguel González-Pleiter<sup>1,3</sup>, and Francisca Fernández-Piñas<sup>1,3\*</sup>

<sup>1</sup> Department of Biology, Faculty of Science, Universidad Autónoma de Madrid, E-28049, Madrid, Spain

<sup>2</sup> Department of Chemical Engineering, Universidad de Alcalá, E-28871 Alcalá de Henares, Madrid, Spain

<sup>3</sup> Centro de Investigación en Biodiversidad y Cambio Global (CIBC-UAM), Universidad Autónoma de Madrid. C Darwin 2, 28049 Madrid, Spain

\* E-mail contact: [francisca.pina@uam.es](mailto:francisca.pina@uam.es)

Δ These authors contributed equally.

#### **Contents**

**Supplementary Text 1:** Protocol to generate, isolate and quantify nanoplastics (NPLs) and oligomers (Olig) through accelerated degradation processes: trituration (non-photooxidized (NP)-NPLs) and photooxidation followed by trituration (photooxidized (P)-NPLs).

**Supplementary Table S1:** pH of ultrapure water and culture medium with 50 mg/L of NP- and P-PBAT-Olig at 0 and 96 h.

**Supplementary Table S2:** Concentrations and incubation times of the fluorochrome probes used for flow cytometry.

**Supplementary Table S3:** Raw data of *C. reinhardtii* growth measured as DO<sub>750</sub> after 72 h exposure to NP/P-PBAT-NPLs & NP/P-PBAT-Olig.

**Supplementary Table S4:** Raw data of *C. reinhardtii* chlorophyll content expressed as mg/L of total chlorophylls after 72 h exposure to NP/P-PBAT-NPLs & NP/P-PBAT-Olig.

**Supplementary Table S5:** Raw data of fluorescence intensity detected in FITC (525/40 nm) of *C. reinhardtii* cells stained with the fluorescent probe DHR123 for reactive oxygen species (ROS) indicator and after 72 h exposure to NP/P-PBAT-NPLs & NP/P-PBAT-Olig.

**Supplementary Table S6:** Raw data of fluorescence intensity detected in FITC (525/40 nm) of *C. reinhardtii* cells stained with the fluorescent probe DiBAC<sub>4</sub>(3) for membrane potential indicator and after 72 h exposure to NP/P-PBAT-NPLs & NP/P-PBAT-Olig.

**Supplementary Table S7:** Raw data of lipid peroxidation, measured by thiobarbituric acid reactive substances method (TBARS) and expressed as µg malondialdehyde (MDA)/mg dry weight (DW), on *C. reinhardtii* after 72 h exposure to NP/P-PBAT-NPLs & NP/P-PBAT-Olig.

**Supplementary Table S8:** Raw data of oxygen evolution expressed as µmol O<sub>2</sub>/mg Σ Chlo (A + B) · h of *C. reinhardtii* after 72 h exposure to NP/P-PBAT-NPLs & NP/P-PBAT-Olig.

**Supplementary Table S9:** Raw data cell size based on flow cytometry back scatter detected with forward scatter FSC of *C. reinhardtii* cells after 72 h exposure to NP/P-PBAT-NPLs & NP/P-PBAT-Olig.

**Supplementary Fig. S1:** A) Size Distribution curves by number of NP- and P-PBAT-NPLs and NP- and P-PBAT-Olig in ultrapure water B) Size Distribution curves by number of NP- and P-PBAT-NPLs and NP- and P-PBAT-Olig in culture medium.

**Supplementary Fig. S2:** MALDI-TOF/TOF spectrum of NP-PBAT-Olig chromatography peaks 1(A), 2(B), 3(C), 4(D), 5(E), 6(F), 7(G) and 8 (H).

**Supplementary Fig. S3:** MALDI-TOF/TOF spectrum of P-PBAT-Olig chromatography peaks 1(A) 2(B), 3(C), 4(D), 5(E) and 6(F).

**Supplementary Fig. S4:** Mean value of butylene-terephthalate units per polymeric series by chromatography peak (from lower to higher hydrophobicity) of NP- (A) and P- (B) PBAT-Olig.

**Supplementary Fig. S5:** Growth, expressed as percentage of variation of OD<sub>750</sub>, on *C. reinhardtii* after 72 h exposure to NP/P-PBAT-NPLs & NP/P-PBAT-Olig. Asterisks indicate treatments that are significantly different (Dunnet's test, (\*\*\*)  $p < 0.001$ .; (\*\*)  $p < 0.01$ .; (\*)  $p < 0.05$ .) from the control represented as 100 % (dot line).

**Supplementary Fig. S6:** Chlorophyll content expressed as percentage of variation of total chlorophylls on *C. reinhardtii* after 72 h exposure to NP/P-PBAT-NPLs & NP/P-PBAT-Olig. Asterisks indicate treatments that are significantly different (Dunnet's test, (\*\*\*)  $p < 0.001$ .; (\*\*)  $p < 0.01$ .; (\*)  $p < 0.05$ .) from the control represented as 100 % (dot line).

**Supplementary Fig. S7:** Representative chlorophyll autofluorescence/bright field overlay images of confocal microscopy of *C. reinhardtii* after 72 h exposure to NP- and P-PBAT-NPLs. Image shows confocal microscopy images of the non-exposed cells (A and D); cells exposed to 0.1 and 10 mg/L of NP-PBAT-NPLs (B and C, respectively); cells exposed to 0.1 and 10 mg/L of P-PBAT-NPLs (E and F, respectively).

**Supplementary Text 1:** Protocol to generate, isolate and quantify nanoplastics (NPLs) and oligomers (Olig) through accelerated degradation processes: trituration (non-photooxidized (NP)-NPLs) and photooxidation followed by trituration (photooxidized (P)-NPLs).

## CONTENTS

### 1 MATERIALS and EQUIPMENT

#### 1.1 CLEANING THE ULTRAFILTRATION TUBES

### 2 OBTENTION OF NON-PHOTOOXIDIZED NANOPLASTICS AND OLIGOMERS BY TRITURATION

#### 2.1 Material trituration process

#### 2.2 Isolation, purification and quantification (dry weight) of nanoplastics and oligomers generated by trituration

#### 2.3 Quantification by dry weight (*for both, Phase 1 and Phase 2*)

### 3 OBTENTION OF PHOTOOXIDIZED NANOPLASTICS AND OLIGOMERS BY PHOTOOXIDATION FOLLOWED BY TRITURATION

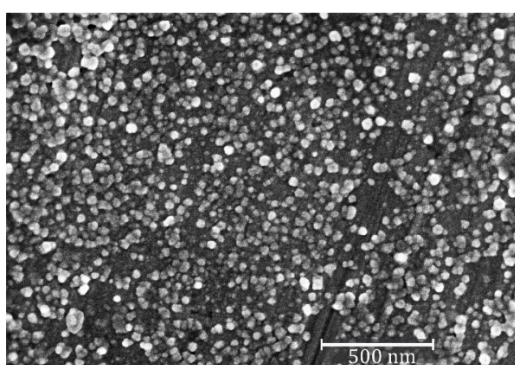

**Nanoplastics**

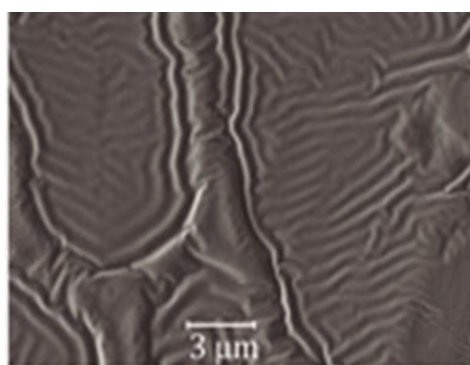

**Oligomers**

## 1 MATERIALS and EQUIPMENT

- Stainless-steel blender (Text S1 Fig. 1).

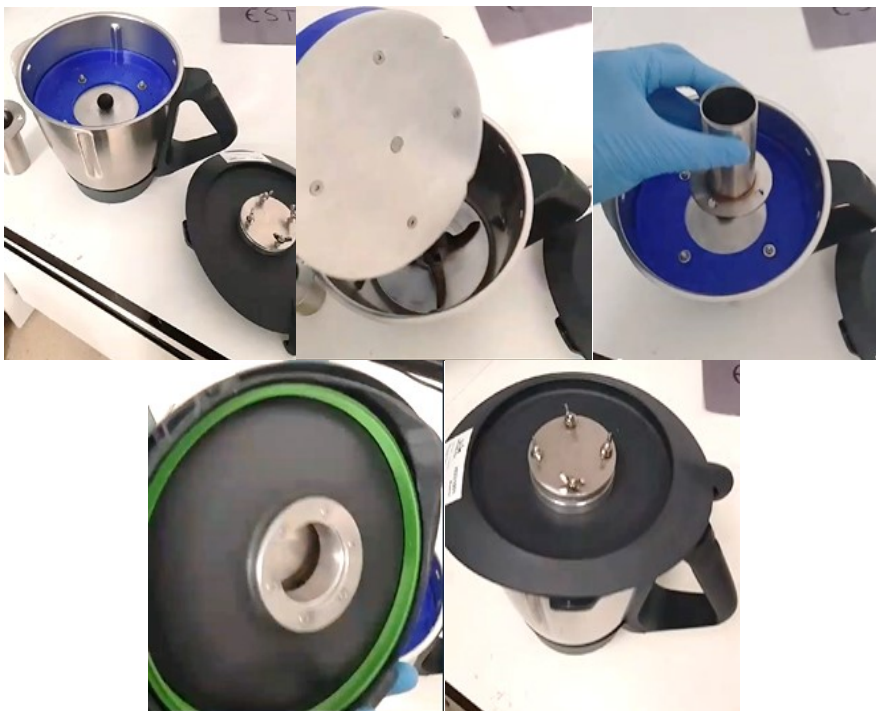

**Text S1 Fig. 1:** Pictures of the modified stainless-steel blender Thermomix TM31 (Vonwerk, Germany) used for the protocol.

- High power ultraviolet lamp (Text S1 Fig. 2).

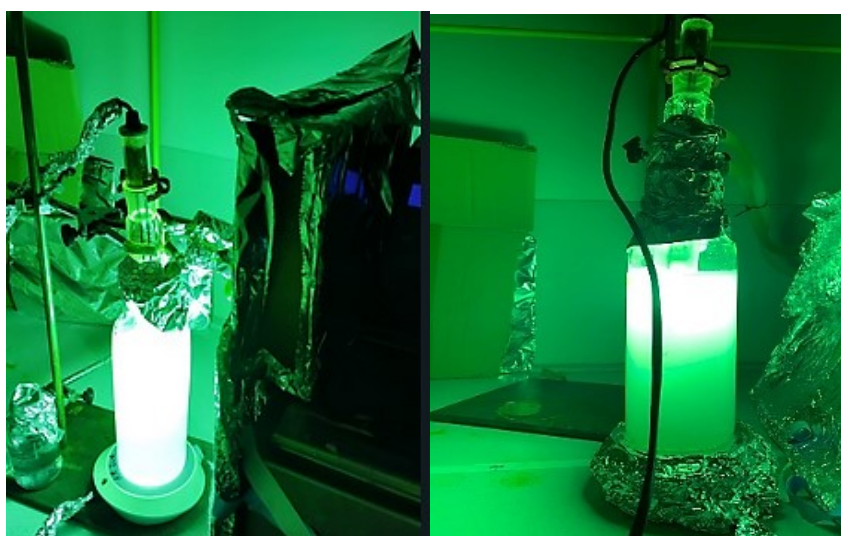

**Text S1 Fig. 2:**  $9.34 \text{ kW m}^{-2}$  at 4 cm medium-pressure mercury lamp (Novalight TQ150) used for the protocol.

- 1mm pore metal strainer with a metal bowl or collector underneath to collect material passing through the filter.
- Liquid nitrogen.
- Magnetic stirrer and magnet.
- 50 KDa (50,000 Daltons) MWCO (Molecular Weight Cut-Off) ultrafiltration tubes.
- Ultra-pure ethanol (> 99.5%).
- 50 mL Falcon tubes.
- Tip sonicator.
- 1  $\mu$ m pore filter suitable for large volumes.
- Drying oven that reaches 60°C.
- Beaker glasses
- Precision balance (capable of weighing up to 0.01 mg).
- Empty glass vials suitable for precision scales (*number the glass vial with an indelible marker before weighing and do not erase*).

***Each generation process requires the use of ultrafiltration tubes, which must be CLEANED before use as follows (Section 1.1):***

## **1.1 CLEANING THE ULTRAFILTRATION TUBES**

- a) Take 4 ultrafiltration tubes with a capacity of 20 ml in the upper part
- b) Add 20 ml of ultra-pure water and centrifuge them for ~2 min at ~4500 rcfs.
- c) Discard the filtered volume remaining in the lower part.
- d) Repeat steps b) and c) 3 more times until washing the 4 tubes have been washed 4 times with ultra-pure water.

## **2 OBTENTION OF NON-PHOTOOXIDIZED NANOPLASTICS AND OLIGOMERS BY TRITURATION**

### **2.1 Material trituration process**

***Triturate up to 300 g of microbeads in the stainless-steel blender to obtain ~210 g (~70 % of the original material) of triturated material < 1 mm:***

- a) Place the microbeads to be triturated in a metal or resistant plastic (polypropylene) container.
- b) Fill the container with liquid nitrogen until the microbeads are covered and let it evaporate.
- c) Allow the microbeads to heat up at room temperature for 1-2 minutes before triturating (if the surface of the microbeads is too cold, the blender is likely to block).
- d) Add the microbeads in the blender and triturate for 1-2 min at maximum revolutions (10,000 rpm). Be careful, the material will continue to heat up during the trituration process, stop the process if the temperature exceeds 30 degrees and continue with step e).
- e) Once triturated, transfer the material from the blender to the 1 mm pore strainer and shake until all the material < 1 mm passes into the collector.
- f) Transfer the fragmented microbeads (> 1 mm) directly from the strainer and repeat steps a), b), c), d) and f) until an approximate amount of 30% wt of the original material remains in the strainer (this amount may vary depending on the polymer).

At this point, the small amount and small size of the fragmented microbeads make the process too inefficient).

- g) Store the grinded material < 1 mm in glass bottles, avoiding exposure to light (use amber bottle, cover the bottle with aluminum, store in an opaque cabinet...).

*The NPLs and oligomers generated are mixed with the triturated material < 1 mm.*

## 2.2 Isolation, purification and quantification (dry weight) of nanoplastics and oligomers generated by trituration

*Based on the application of the protocol with PBAT, we estimate that this protocol will yield between 2 and 4 mg of NPLs per 20 g of triturated material < 1mm.*

This process is performed in two consecutive phases, the first aims to isolate the oligomeric fraction in ultra-pure ethanol, as the main objective, together with a small amount of the NPLs; the second phase is focused on extracting the maximum amount of NPLs using an ethanol/water mixture during the extraction. It is proposed to discard the volume retained in the lower part since it contains water, which would make the isolation of the oligomeric fraction take a considerable amount of time (the oligomers are usually most of the mass fraction, whereby enough material would be obtained only with the **Phase 1**):

- a) Start transferring 80 grams of triturated material (< 1 mm) [section 2.1)] to 4 100 mL beaker glasses (20 g per beaker glass).

### **Phase 1:**

- b) Add 80 mL of ultra-pure ethanol at 30 °C to each beaker glass.
- c) Sonicate each beaker glass individually for 1 min using a tip sonicator at enough power to shake the whole triturated material (typically at 60% duty cycle and 260 W using a Branson Ultrasonics™ Sonifier™ S-450A) and allow the material to settle for ~1 min.
- d) Collect the maximum possible volume of ultra-pure ethanol (~320 mL) and filter through a 1 µm pore filter.

*It is important not to exceed the flow rate recommended by the manufacturer, which in the case of glass fiber filters (Whatman) is 81 mL/min, to avoid the release of glass microfibers into the samples.*

*For greater safety, a stainless-steel filter with a 10 µm pore size can be placed between the glass fiber filter and the support (in contact with the filter) to retain the fibers that come off (most of which are larger than 10 µm) or use a nylon filter.*

*For avoid the filter clogging, replace the filter every 100 mL.*

- e) Transfer the filtered material to the upper part of 4 ultrafiltration tubes (20 mL per tube).
- f) Centrifuge the ultrafiltration tubes at room temperature at ~4000 rcfs until the entire volume is ultrafiltered (~ 2-4 min).
- g) **The volume retained in the lower part of the tubes** should be kept separately, **it is the oligomeric fraction (Text S1 Fig. 3).**



- h) Repeat steps e), f) and g) until the entire volume (~ 320 mL) is ultrafiltered.

*The last centrifugations may take longer due to the membranes clogging (usually not more than 10 minutes).*

- i) After ultrafiltration of the entire volume, transfer the oligomeric fraction to a beaker glass and dry in a clean oven at 60 °C until complete drying (dried oligomers have an oily appearance).
- j) Resuspend the material in 2-3 mL of ultra-pure ethanol and transfer it to an empty and previously weighed small glass vial (weigh without cap) and dry it in a clean oven at 60 °C until completely dry (dried oligomers present oily appearance).

### **Phase 2:**

- k) Prepare 320 mL of 25% v/v ultra-pure ethanol in ultra-pure water (240 mL of ultra-pure water and 80 mL of ultra-pure ethanol in a glass bottle).
- l) Transfer 80 mL of the solution prepared in the previous step, into 4 beaker glasses containing 20 g of triturated material (< 1 mm) that has already been extracted with ultra-pure ethanol following **Phase 1** (new triturated material can be added to increase the efficiency of NPLs extraction).
- m) Cool the beaker glasses at 4 °C for 15 min to prevent the dissolution of NPLs.
- n) Sonicate each beaker glass individually for 1 min using a tip sonicator at enough power to shake the whole triturated material (typically at 60% duty cycle and 260 W using a Branson Ultrasonics™ Sonifier™ S-450A) and allow the material to settle for ~1 min.
- o) Collect the whole possible volume of ultra-pure ethanol at 25% in ultra-pure water (~250-300 mL) and filter through a 1 µm pore filter.
- p) Store the filtered material at 4 °C for 10-15 minutes to prevent the dissolution of NPLs.
- q) Transfer the filtered material to the upper part of the 4 ultrafiltration tubes used in the **Phase 1** (20 mL per tube).
- r) Centrifuge the ultrafiltration tubes at room temperature at ~4000 rcfs until the entire volume is ultrafiltered (5-15 min).
- s) The volume retained at the bottom of the tubes is discarded in case the triturated material used had been previously subjected to the **Phase 1** (it contains few oligomers; Text S1 Fig. 3).

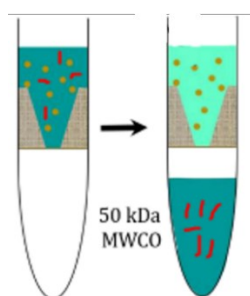

**Text S1 Fig. 3:** Graphical image of the ultrafiltration process (yellow circles represent nanoplastics, red lines oligomers less than 50 KDa).



- t) Repeat steps m), n), r), and s) until the entire volume (~ 300 mL) is ultrafiltered.

*The last centrifugations may take longer due to the membranes clogging (usually not more than 10 minutes).*

- u) After ultrafiltering the entire volume, one more ultrafiltration should be performed using cold ultra-pure ethanol (1 h at 4 °C) to clean **the fraction of NPLs that have been retained in the membranes.**
- v) The NPLs fraction is recovered by vigorously pipetting a volume of ~ 2 – 3 mL into the upper part of the tube, and subsequently that volume is stored in an empty and previously weighed small glass vial (weigh without cap) and dry it in a clean oven at 60 °C until completely dry.

### 2.3 Quantification by dry weight *(for both, Phase 1 and Phase 2)*

When both fractions are dried, the **small glass vials (without cap) containing the NPLs or the oligomers should be weighed.** From this weight, the initial weight of the empty bottle (without cap) is subtracted to obtain the mass of the material generated.

*Balance accuracy were  $\pm 0.01$  mg is suggested*

## 3 OBTENTION OF PHOTOOXIDIZED NANOPLASTICS AND OLIGOMERS BY **PHOTOOXIDATION** FOLLOWED BY **TRITURATION**

- a) Place a maximum of 100 g of microbeads into the UV light lamp bottle filled with ~800 mL of ultra-pure ethanol.
- b) Allow the photo-aging test to run for the days defined in the experimental design on the basis of the power applied and the photoaging scenario to be simulated.

*In this study the lamp irradiates at  $\sim 9.34 \text{ kW m}^{-2}$  (approximately 120 times the solar irradiance in the Iberian Peninsula) during 96 h, irradiation that corresponds to  $\sim 16$  months of average sunlight in the Iberian Peninsula ( $7.7 \text{ kWh m}^{-2} \text{ day}^{-1}$ ).*

- c) Separately collect the ultra-pure ethanol (containing NPLs, oligomers and photooxidized material  $> 1 \mu\text{m}$ ) and the photooxidized microbeads.
- d) Filter the ethanol from the previous step through  $1 \mu\text{m}$  pore filters to isolate and purify the material contained in ultra-pure ethanol as follows:
  - a. Transfer the filtered material to the upper part of 4 ultrafiltration tubes (20 mL per tube).
  - b. Centrifuge the ultrafiltration tubes at room temperature at  $\sim 4000$  rcfs until the entire volume is ultrafiltered ( $\sim 2\text{-}4$  min).

*The last centrifugations may take longer due to the membranes clogging (usually not more than 10 minutes).*

- c. **The volume retained in the lower part of the tubes** should be kept separately, **it is the oligomeric fraction** (Text S1 Fig. 4).

- d. After storage of the photooxidized material, one more ultrafiltration should be performed using cold ultra-pure ethanol (1 h at 4 °C) to clean **the fraction of NPLs that have been retained in the membranes.**
  - e. The NPLs fraction is recovered by vigorously pipetting a volume of ~ 2 – 3 mL into the upper part of the tube, and subsequently that volume is stored in an empty and previously weighed small glass vial (weigh without cap) and dry it in a clean oven at 60 °C until completely dry.
- e)** Triturate the photooxidized microbeads as described in section 2.2) and follow the **Phase 1** and **Phase 2** to obtain photooxidized nanoplastics and oligomers. Transfer these materials together with those obtained from the ultra-pure ethanol used during the photooxidation (described in section 3.d) to the same glass vials to proceed with the quantification by dry weight measurement (section 2.3).

**Supplementary Table S1:** pH of ultrapure water and culture medium with 50 mg/L of NP- and P-PBAT-Olig at 0 and 96 h.

| Medium        | Ultrapure water pH |      | TAP/6 pH |      |
|---------------|--------------------|------|----------|------|
|               | 0h                 | 96h  | 0h       | 96h  |
| Without Oligs | 5.8                | 5.64 | 6.96     | 7.09 |
| NP-PBAT-Olig  | 5.14               | 5.15 | 6.88     | 7.08 |
| P-PBAT-Olig   | 4.47               | 4.54 | 6.85     | 7.08 |

**Supplementary Table S2:** Concentrations and incubation times of the fluorochrome probes used for flow cytometry.

| Fluorochrome                                       | Acronym                | Physiological parameter                        | Final concentration ( $\mu\text{g mL}^{-1}$ ) | Incubation time (min) | Channel |
|----------------------------------------------------|------------------------|------------------------------------------------|-----------------------------------------------|-----------------------|---------|
| Dihydrorhodamine 123                               | DHR123                 | Intracellular levels of $\text{H}_2\text{O}_2$ | 10                                            | 40                    | FITC    |
| Bis-(1,3-dibutylbarbituric acid) trimethine oxonol | DiBAC <sub>4</sub> (3) | Cytoplasmic membrane potential                 | 2.5                                           | 10                    | FITC    |

**Supplementary Table S3:** Raw data of *C. reinhardtii* growth measured as OD<sub>750</sub> after 72 h exposure to NP/P-PBAT-NPLs & NP/P-PBAT-Olig.

| SAMPLE       | [NPLs]                | OD <sub>750</sub> Raw Mean | OD <sub>750</sub> Raw SD |
|--------------|-----------------------|----------------------------|--------------------------|
| NP-PBAT-NPLs | Control for 0.01 mg/L | 1.385                      | 0.093                    |
|              | Control for 0.1 mg/L  | 1.090                      | 0.049                    |
|              | Control for 1 mg/L    | 1.090                      | 0.049                    |
|              | Control for 10 mg/L   | 1.090                      | 0.049                    |
|              | Control for 50 mg/L   | 1.385                      | 0.093                    |
|              | 0.01 mg/L             | 1.262                      | 0.058                    |
|              | 0.1 mg/L              | 1.036                      | 0.050                    |
|              | 1 mg/L                | 1.019                      | 0.076                    |
|              | 10 mg/L               | 0.981                      | 0.016                    |
|              | 50 mg/L               | 1.248                      | 0.101                    |
| SAMPLE       | [NPLs]                | OD <sub>750</sub> Raw Mean | OD <sub>750</sub> Raw SD |
| P-PBAT-NPLs  | Control for 0.01 mg/L | 1.385                      | 0.093                    |
|              | Control for 0.1 mg/L  | 1.385                      | 0.093                    |
|              | Control for 1 mg/L    | 1.385                      | 0.093                    |
|              | Control for 10 mg/L   | 1.385                      | 0.093                    |
|              | Control for 50 mg/L   | 1.385                      | 0.093                    |
|              | 0.01 mg/L             | 1.171                      | 0.033                    |
|              | 0.1 mg/L              | 1.238                      | 0.050                    |

|                     |                       |                                  |                                |
|---------------------|-----------------------|----------------------------------|--------------------------------|
|                     | 1 mg/L                | 1.275                            | 0.074                          |
|                     | 10 mg/L               | 1.268                            | 0.062                          |
|                     | 50 mg/L               | 1.263                            | 0.142                          |
| <b>SAMPLE</b>       | <b>[Olig]</b>         | <b>OD<sub>750</sub> Raw Mean</b> | <b>OD<sub>750</sub> Raw SD</b> |
| <b>NP-PBAT-Olig</b> | Control for 0.01 mg/L | 1.146                            | 0.073                          |
|                     | Control for 0.1 mg/L  | 1.125                            | 0.072                          |
|                     | Control for 1 mg/L    | 1.125                            | 0.072                          |
|                     | Control for 10 mg/L   | 1.125                            | 0.072                          |
|                     | Control for 50 mg/L   | 1.146                            | 0.073                          |
|                     | 0.01 mg/L             | 1.188                            | 0.100                          |
|                     | 0.1 mg/L              | 1.016                            | 0.116                          |
|                     | 1 mg/L                | 1.160                            | 0.136                          |
|                     | 10 mg/L               | 1.064                            | 0.071                          |
|                     | 50 mg/L               | 0.975                            | 0.091                          |
| <b>SAMPLE</b>       | <b>[Olig]</b>         | <b>OD<sub>750</sub> Raw Mean</b> | <b>OD<sub>750</sub> Raw SD</b> |
| <b>P-PBAT-Olig</b>  | Control for 0.01 mg/L | 1.146                            | 0.073                          |
|                     | Control for 0.1 mg/L  | 1.125                            | 0.072                          |
|                     | Control for 1 mg/L    | 1.125                            | 0.072                          |
|                     | Control for 10 mg/L   | 1.125                            | 0.072                          |
|                     | Control for 50 mg/L   | 1.146                            | 0.073                          |
|                     | 0.01 mg/L             | 1.119                            | 0.080                          |
|                     | 0.1 mg/L              | 1.142                            | 0.134                          |
|                     | 1 mg/L                | 1.154                            | 0.032                          |
|                     | 10 mg/L               | 1.108                            | 0.062                          |
|                     | 50 mg/L               | 1.179                            | 0.099                          |

**Supplementary Table S4:** Raw data of *C. reinhardtii* chlorophyll content expressed as mg/L of total chlorophylls after 72 h exposure to NP/P-PBAT-NPLs & NP/P-PBAT-Olig.

|                     |                       |                                       |                                     |
|---------------------|-----------------------|---------------------------------------|-------------------------------------|
| <b>SAMPLE</b>       | <b>[NPLs]</b>         | <b>Σ Chlo (A + B) (mg/L) Raw Mean</b> | <b>Σ Chlo (A + B) (mg/L) Raw SD</b> |
| <b>NP-PBAT-NPLs</b> | Control for 0.01 mg/L | 9.841                                 | 0.243                               |
|                     | Control for 0.1 mg/L  | 7.379                                 | 0.145                               |
|                     | Control for 1 mg/L    | 7.379                                 | 0.145                               |
|                     | Control for 10 mg/L   | 7.379                                 | 0.145                               |
|                     | Control for 50 mg/L   | 9.841                                 | 0.243                               |
|                     | 0.01 mg/L             | 9.741                                 | 0.269                               |
|                     | 0.1 mg/L              | 7.347                                 | 0.189                               |
|                     | 1 mg/L                | 6.823                                 | 0.851                               |
|                     | 10 mg/L               | 7.245                                 | 0.293                               |

|              | 50 mg/L               | 9.732                                 | 0.556                               |
|--------------|-----------------------|---------------------------------------|-------------------------------------|
| SAMPLE       | [NPLs]                | $\Sigma$ Chlo (A + B) (mg/L) Raw Mean | $\Sigma$ Chlo (A + B) (mg/L) Raw SD |
| P-PBAT-NPLs  | Control for 0.01 mg/L | 7.379                                 | 0.145                               |
|              | Control for 0.1 mg/L  | 7.379                                 | 0.145                               |
|              | Control for 1 mg/L    | 7.379                                 | 0.145                               |
|              | Control for 10 mg/L   | 7.379                                 | 0.145                               |
|              | Control for 50 mg/L   | 7.379                                 | 0.145                               |
|              | 0.01 mg/L             | 10.374                                | 0.689                               |
|              | 0.1 mg/L              | 10.306                                | 0.116                               |
|              | 1 mg/L                | 10.441                                | 0.017                               |
|              | 10 mg/L               | 10.171                                | 0.146                               |
|              | 50 mg/L               | 9.461                                 | 1.362                               |
| SAMPLE       | [Olig]                | $\Sigma$ Chlo (A + B) (mg/L) Raw Mean | $\Sigma$ Chlo (A + B) (mg/L) Raw SD |
| NP-PBAT-Olig | Control for 0.01 mg/L | 8.146                                 | 0.987                               |
|              | Control for 0.1 mg/L  | 8.336                                 | 0.788                               |
|              | Control for 1 mg/L    | 8.336                                 | 0.788                               |
|              | Control for 10 mg/L   | 8.336                                 | 0.788                               |
|              | Control for 50 mg/L   | 8.146                                 | 0.987                               |
|              | 0.01 mg/L             | 7.011                                 | 1.397                               |
|              | 0.1 mg/L              | 6.782                                 | 2.288                               |
|              | 1 mg/L                | 8.687                                 | 1.266                               |
|              | 10 mg/L               | 7.525                                 | 2.729                               |
|              | 50 mg/L               | 6.430                                 | 0.650                               |
| SAMPLE       | [Olig]                | $\Sigma$ Chlo (A + B) (mg/L) Raw Mean | $\Sigma$ Chlo (A + B) (mg/L) Raw SD |
| P-PBAT-Olig  | Control for 0.01 mg/L | 8.146                                 | 0.987                               |
|              | Control for 0.1 mg/L  | 8.336                                 | 0.788                               |
|              | Control for 1 mg/L    | 8.336                                 | 0.788                               |
|              | Control for 10 mg/L   | 8.336                                 | 0.788                               |
|              | Control for 50 mg/L   | 8.146                                 | 0.987                               |
|              | 0.01 mg/L             | 8.335                                 | 1.749                               |
|              | 0.1 mg/L              | 8.758                                 | 1.109                               |
|              | 1 mg/L                | 8.801                                 | 1.784                               |
|              | 10 mg/L               | 8.176                                 | 2.060                               |
|              | 50 mg/L               | 5.961                                 | 0.484                               |

**Supplementary Table S5:** Raw data of fluorescence intensity detected in FITC (525/40 nm) of *C. reinhardtii* cells stained with the fluorescent probe DHR123 for reactive oxygen species (ROS) indicator and after 72 h exposure to NP/P-PBAT-NPLs & NP/P-PBAT-Olig.

| SAMPLE       | [NPLs]                | FITC Signal Raw Mean | FITC Signal Raw SD |
|--------------|-----------------------|----------------------|--------------------|
| NP-PBAT-NPLs | Control for 0.01 mg/L | 26,935               | 2,595              |
|              | Control for 0.1 mg/L  | 27,819               | 2,482              |
|              | Control for 1 mg/L    | 26,093               | 3,366              |
|              | Control for 10 mg/L   | 28,709               | 5,572              |
|              | Control for 50 mg/L   | 28,898               | 1,068              |
|              | 0.01 mg/L             | 34,850               | 4,482              |
|              | 0.1 mg/L              | 32,914               | 5,397              |
|              | 1 mg/L                | 31,900               | 2,771              |
|              | 10 mg/L               | 38,858               | 4,565              |
|              | 50 mg/L               | 44,520               | 7,955              |
| SAMPLE       | [NPLs]                | FITC Signal Raw Mean | FITC Signal Raw SD |
| P-PBAT-NPLs  | Control for 0.01 mg/L | 21,120               | 684                |
|              | Control for 0.1 mg/L  | 22,173               | 2,594              |
|              | Control for 1 mg/L    | 20,966               | 863                |
|              | Control for 10 mg/L   | 26,824               | 3,117              |
|              | Control for 50 mg/L   | 20,602               | 1,461              |
|              | 0.01 mg/L             | 24,769               | 1,964              |
|              | 0.1 mg/L              | 25,531               | 4,387              |
|              | 1 mg/L                | 24,989               | 4,862              |
|              | 10 mg/L               | 34,040               | 4,871              |
|              | 50 mg/L               | 28,291               | 1,447              |
| SAMPLE       | [Olig]                | FITC Signal Raw Mean | FITC Signal Raw SD |
| NP-PBAT-Olig | Control for 0.01 mg/L | 23,996               | 1,315              |
|              | Control for 0.1 mg/L  | 21,518               | 1,700              |
|              | Control for 1 mg/L    | 28,909               | 3,093              |
|              | Control for 10 mg/L   | 28,411               | 2,770              |
|              | Control for 50 mg/L   | 30,395               | 1,730              |
|              | 0.01 mg/L             | 23,638               | 2,406              |
|              | 0.1 mg/L              | 20,371               | 2,416              |
|              | 1 mg/L                | 30,819               | 2,163              |
|              | 10 mg/L               | 33,488               | 4,579              |
|              | 50 mg/L               | 39,227               | 2,736              |
| SAMPLE       | [Olig]                | FITC Signal Raw Mean | FITC Signal Raw SD |
| P-PBAT-Olig  | Control for 0.01 mg/L | 21,193               | 2,838              |
|              | Control for 0.1 mg/L  | 34,068               | 1,785              |
|              | Control for 1 mg/L    | 48,351               | 8,628              |
|              | Control for 10 mg/L   | 49,510               | 5,130              |
|              | Control for 50 mg/L   | 20,647               | 1,712              |
|              | 0.01 mg/L             | 21,061               | 3,458              |
|              | 0.1 mg/L              | 34,950               | 855                |
|              | 1 mg/L                | 48,909               | 6,168              |
|              | 10 mg/L               | 56,917               | 9,106              |
|              | 50 mg/L               | 26,332               | 3,578              |

**Supplementary Table S6:** Raw data of fluorescence intensity detected in FITC (525/40 nm) of *C. reinhardtii* cells stained with the fluorescent probe DiBAC<sub>4</sub>(3) for membrane potential indicator and after 72 h exposure to NP/P-PBAT-NPLs & NP/P-PBAT-Olig.

| SAMPLE              | [NPLs]                | FITC Signal Raw Mean | FITC Signal Raw SD |
|---------------------|-----------------------|----------------------|--------------------|
| <b>NP-PBAT-NPLs</b> | Control for 0.01 mg/L | 3,758                | 637                |
|                     | Control for 0.1 mg/L  | 5,283                | 809                |
|                     | Control for 1 mg/L    | 6,313                | 818                |
|                     | Control for 10 mg/L   | 7,412                | 105                |
|                     | Control for 50 mg/L   | 7,850                | 345                |
|                     | 0.01 mg/L             | 3,880                | 595                |
|                     | 0.1 mg/L              | 5,111                | 1,152              |
|                     | 1 mg/L                | 6,409                | 951                |
|                     | 10 mg/L               | 9,228                | 895                |
|                     | 50 mg/L               | 12,103               | 2,374              |
| SAMPLE              | [NPLs]                | FITC Signal Raw Mean | FITC Signal Raw SD |
| <b>P-PBAT-NPLs</b>  | Control for 0.01 mg/L | 2,943                | 384                |
|                     | Control for 0.1 mg/L  | 5,527                | 545                |
|                     | Control for 1 mg/L    | 7,026                | 789                |
|                     | Control for 10 mg/L   | 8,244                | 693                |
|                     | Control for 50 mg/L   | 5,663                | 819                |
|                     | 0.01 mg/L             | 2,893                | 291                |
|                     | 0.1 mg/L              | 6,087                | 1,007              |
|                     | 1 mg/L                | 8,082                | 641                |
|                     | 10 mg/L               | 9,499                | 434                |
|                     | 50 mg/L               | 7,400                | 537                |
| SAMPLE              | [Olig]                | FITC Signal Raw Mean | FITC Signal Raw SD |
| <b>NP-PBAT-Olig</b> | Control for 0.01 mg/L | 3,181                | 634                |
|                     | Control for 0.1 mg/L  | 3,105                | 555                |
|                     | Control for 1 mg/L    | 2,990                | 262                |
|                     | Control for 10 mg/L   | 2,762                | 184                |
|                     | Control for 50 mg/L   | 2,686                | 54                 |
|                     | 0.01 mg/L             | 3,215                | 417                |
|                     | 0.1 mg/L              | 3,244                | 531                |
|                     | 1 mg/L                | 3,300                | 365                |
|                     | 10 mg/L               | 3,136                | 284                |
|                     | 50 mg/L               | 3,418                | 155                |
| SAMPLE              | [Olig]                | FITC Signal Raw Mean | FITC Signal Raw SD |
| <b>P-PBAT-Olig</b>  | Control for 0.01 mg/L | 2972                 | 345                |
|                     | Control for 0.1 mg/L  | 2890                 | 307                |



|  |                     |       |     |
|--|---------------------|-------|-----|
|  | Control for 1 mg/L  | 2,875 | 200 |
|  | Control for 10 mg/L | 2,690 | 222 |
|  | Control for 50 mg/L | 2,630 | 99  |
|  | 0.01 mg/L           | 3,282 | 233 |
|  | 0.1 mg/L            | 3,050 | 500 |
|  | 1 mg/L              | 3,242 | 543 |
|  | 10 mg/L             | 3,053 | 454 |
|  | 50 mg/L             | 3,210 | 481 |

**Supplementary Table S7:** Raw data of lipid peroxidation, measured by thiobarbituric acid reactive substances method (TBARS) and expressed as  $\mu\text{g}$  malondialdehyde (MDA)/mg dry weight (DW), on *C. reinhardtii* after 72 h exposure to NP/P-PBAT-NPLs & NP/P-PBAT-Olig.

| SAMPLE       | [NPLs]                | TBARS ( $\mu\text{g}$ MDA/mg DW)<br>Raw Mean | TBARS ( $\mu\text{g}$ MDA/mg DW)<br>Raw SE |
|--------------|-----------------------|----------------------------------------------|--------------------------------------------|
| NP-PBAT-NPLs | Control for 0.01 mg/L | 0.030                                        | 0.002                                      |
|              | Control for 0.1 mg/L  | 0.030                                        | 0.002                                      |
|              | Control for 1 mg/L    | 0.030                                        | 0.002                                      |
|              | Control for 10 mg/L   | 0.030                                        | 0.002                                      |
|              | Control for 50 mg/L   | 0.030                                        | 0.002                                      |
|              | 0.01 mg/L             | 0.035                                        | 0.004                                      |
|              | 0.1 mg/L              | 0.035                                        | 0.004                                      |
|              | 1 mg/L                | 0.035                                        | 0.002                                      |
|              | 10 mg/L               | 0.043                                        | 0.002                                      |
|              | 50 mg/L               | 0.046                                        | 0.004                                      |
| SAMPLE       | [NPLs]                | TBARS ( $\mu\text{g}$ MDA/mg DW)<br>Raw Mean | TBARS ( $\mu\text{g}$ MDA/mg DW)<br>Raw SE |
| P-PBAT-NPLs  | Control for 0.01 mg/L | 0.030                                        | 0.002                                      |
|              | Control for 0.1 mg/L  | 0.030                                        | 0.002                                      |
|              | Control for 1 mg/L    | 0.030                                        | 0.002                                      |
|              | Control for 10 mg/L   | 0.030                                        | 0.002                                      |
|              | Control for 50 mg/L   | 0.030                                        | 0.002                                      |
|              | 0.01 mg/L             | 0.034                                        | 0.005                                      |
|              | 0.1 mg/L              | 0.035                                        | 0.004                                      |
|              | 1 mg/L                | 0.035                                        | 0.002                                      |
|              | 10 mg/L               | 0.042                                        | 0.004                                      |
|              | 50 mg/L               | 0.045                                        | 0.005                                      |
| SAMPLE       | [Olig]                | TBARS ( $\mu\text{g}$ MDA/mg DW)<br>Raw Mean | TBARS ( $\mu\text{g}$ MDA/mg DW)<br>Raw SE |

|                     |                       |                                          |                                        |
|---------------------|-----------------------|------------------------------------------|----------------------------------------|
| <b>NP-PBAT-Olig</b> | Control for 0.01 mg/L | 0.030                                    | 0.004                                  |
|                     | Control for 0.1 mg/L  | 0.030                                    | 0.004                                  |
|                     | Control for 1 mg/L    | 0.030                                    | 0.004                                  |
|                     | Control for 10 mg/L   | 0.030                                    | 0.004                                  |
|                     | Control for 50 mg/L   | 0.030                                    | 0.004                                  |
|                     | 0.01 mg/L             | 0.034                                    | 0.004                                  |
|                     | 0.1 mg/L              | 0.034                                    | 0.003                                  |
|                     | 1 mg/L                | 0.034                                    | 0.002                                  |
|                     | 10 mg/L               | 0.035                                    | 0.004                                  |
|                     | 50 mg/L               | 0.038                                    | 0.006                                  |
| <b>SAMPLE</b>       | <b>[Olig]</b>         | <b>TBARS (μg MDA/mg DW)<br/>Raw Mean</b> | <b>TBARS (μg MDA/mg<br/>DW) Raw SE</b> |
| <b>P-PBAT-Olig</b>  | Control for 0.01 mg/L | 0.030                                    | 0.004                                  |
|                     | Control for 0.1 mg/L  | 0.030                                    | 0.004                                  |
|                     | Control for 1 mg/L    | 0.030                                    | 0.004                                  |
|                     | Control for 10 mg/L   | 0.030                                    | 0.004                                  |
|                     | Control for 50 mg/L   | 0.030                                    | 0.004                                  |
|                     | 0.01 mg/L             | 0.034                                    | 0.002                                  |
|                     | 0.1 mg/L              | 0.034                                    | 0.003                                  |
|                     | 1 mg/L                | 0.034                                    | 0.004                                  |
|                     | 10 mg/L               | 0.035                                    | 0.003                                  |
|                     | 50 mg/L               | 0.038                                    | 0.003                                  |

**Supplementary Table S8:** Raw data of oxygen evolution expressed as  $\mu\text{mol O}_2/\text{mg } \Sigma \text{ Chlo (A + B)} \cdot \text{h}$  of *C. reinhardtii* after 72 h exposure to NP/P-PBAT-NPLs & NP/P-PBAT-Olig.

| <b>SAMPLE</b>       | <b>[NPLs]</b> | <b><math>\mu\text{mol O}_2/\text{mg } \Sigma \text{ Chlo (A + B)}</math><br/><b><math>\cdot \text{h Raw Mean}</math></b></b> | <b><math>\mu\text{mol O}_2/\text{mg } \Sigma \text{ Chlo (A + B)}</math><br/><b><math>\cdot \text{h Raw SD}</math></b></b> |
|---------------------|---------------|------------------------------------------------------------------------------------------------------------------------------|----------------------------------------------------------------------------------------------------------------------------|
| <b>NP-PBAT-NPLs</b> | Control       | 225.4                                                                                                                        | 9.5                                                                                                                        |
|                     | 0.1 mg/L      | 201.9                                                                                                                        | 15.4                                                                                                                       |
|                     | 10 mg/L       | 187.4                                                                                                                        | 2.5                                                                                                                        |
| <b>SAMPLE</b>       | <b>[NPLs]</b> | <b><math>\mu\text{mol O}_2/\text{mg } \Sigma \text{ Chlo (A + B)}</math><br/><b><math>\cdot \text{h Raw Mean}</math></b></b> | <b><math>\mu\text{mol O}_2/\text{mg } \Sigma \text{ Chlo (A + B)}</math><br/><b><math>\cdot \text{h Raw SD}</math></b></b> |
| <b>P-PBAT-NPLs</b>  | Control       | 225.4                                                                                                                        | 9.5                                                                                                                        |
|                     | 0.1 mg/L      | 205.4                                                                                                                        | 7.6                                                                                                                        |
|                     | 10 mg/L       | 185.6                                                                                                                        | 19.1                                                                                                                       |
| <b>SAMPLE</b>       | <b>[NPLs]</b> | <b><math>\mu\text{mol O}_2/\text{mg } \Sigma \text{ Chlo (A + B)}</math><br/><b><math>\cdot \text{h Raw Mean}</math></b></b> | <b><math>\mu\text{mol O}_2/\text{mg } \Sigma \text{ Chlo (A + B)}</math><br/><b><math>\cdot \text{h Raw SD}</math></b></b> |
| <b>NP-PBAT-Olig</b> | Control       | 232.6                                                                                                                        | 19.4                                                                                                                       |
|                     | 0.1 mg/L      | 214.3                                                                                                                        | 3.7                                                                                                                        |
|                     | 10 mg/L       | 204.9                                                                                                                        | 17.5                                                                                                                       |

| SAMPLE      | [NPLs]   | $\mu\text{mol O}_2/\text{mg } \Sigma \text{ Chlo (A + B)}$<br>· h Raw Mean | $\mu\text{mol O}_2/\text{mg } \Sigma \text{ Chlo (A + B)}$<br>· h Raw SD |
|-------------|----------|----------------------------------------------------------------------------|--------------------------------------------------------------------------|
| P-PBAT-Olig | Control  | 232.6                                                                      | 19.4                                                                     |
|             | 0.1 mg/L | 205.3                                                                      | 13.7                                                                     |
|             | 10 mg/L  | 195.9                                                                      | 4.5                                                                      |

**Supplementary Table S9:** Raw data cell size based on flow cytometry back scatter detected with forward scatter FSC of *C. reinhardtii* cells after 72 h exposure to NP/P-PBAT-NPLs & NP/P-PBAT-Olig.

| SAMPLE       | [NPLs]   | FSC Raw Mean | FSC Raw SD |
|--------------|----------|--------------|------------|
| NP-PBAT-NPLs | Control  | 786,653      | 19,144     |
|              | 0.1 mg/L | 789,255      | 17,488     |
|              | 10 mg/L  | 834,648      | 20,244     |
| SAMPLE       | [NPLs]   | FSC Raw Mean | FSC Raw SD |
| P-PBAT-NPLs  | Control  | 776,479      | 18,606     |
|              | 0.1 mg/L | 783,186      | 8,697      |
|              | 10 mg/L  | 822,909      | 23,747     |
| SAMPLE       | [NPLs]   | FSC Raw Mean | FSC Raw SD |
| NP-PBAT-Olig | Control  | 1,004,230    | 139,767    |
|              | 0.1 mg/L | 945,057      | 104,617    |
|              | 10 mg/L  | 1,000,270    | 101,500    |
| SAMPLE       | [NPLs]   | FSC Raw Mean | FSC Raw SD |
| P-PBAT-Olig  | Control  | 1,004,230    | 139,767    |
|              | 0.1 mg/L | 945,057      | 104,617    |
|              | 10 mg/L  | 1,000,270    | 101,500    |

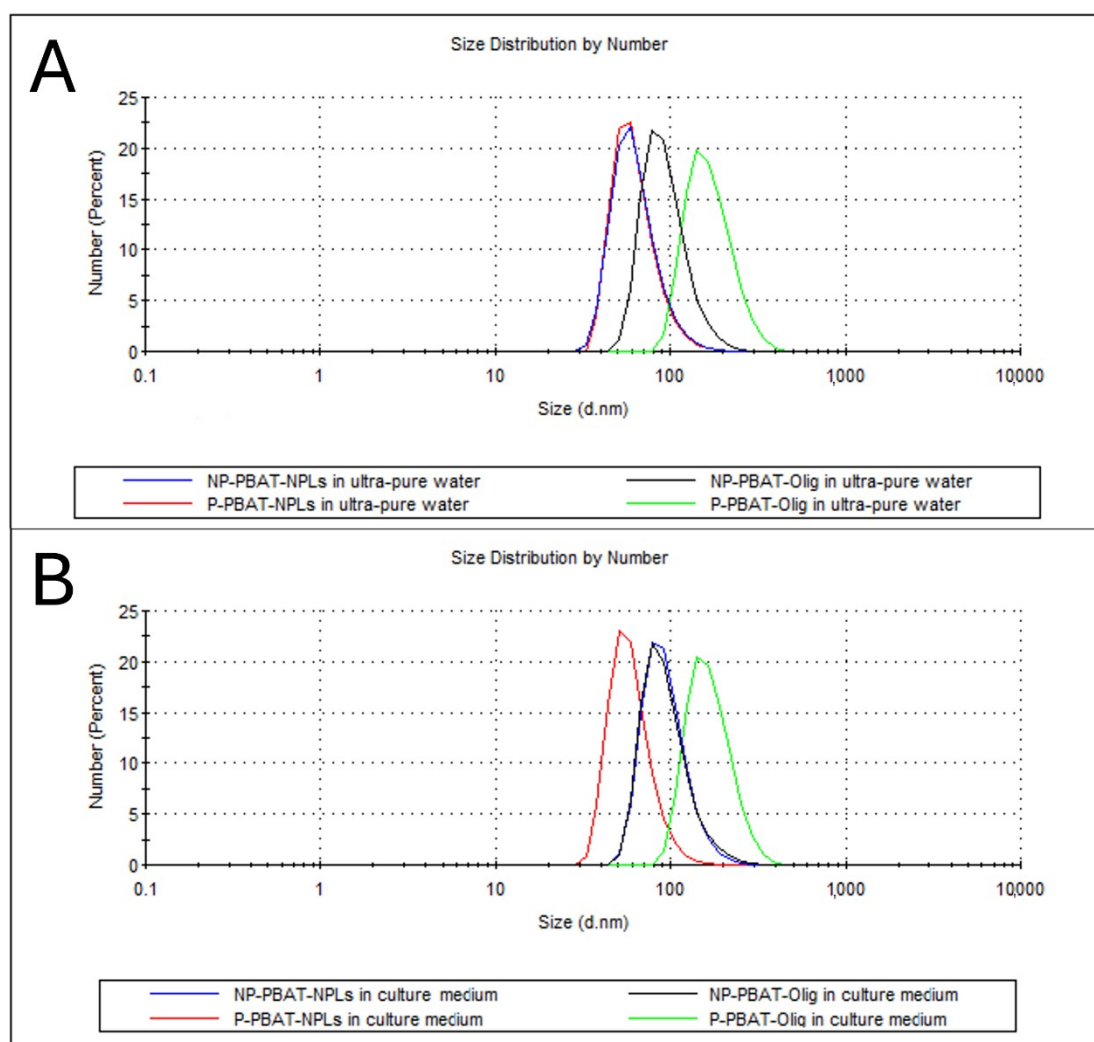

**Supplementary Fig. S1:** A) Hydrodynamic size distribution curves by number (measured by Dynamic Light Scattering) of NP- and P-PBAT-NPLs and NP- and P-PBAT-Olig in ultrapure water B) Hydrodynamic size distribution curves by number of NP- and P-PBAT-NPLs and NP- and P-PBAT-Olig in culture medium.

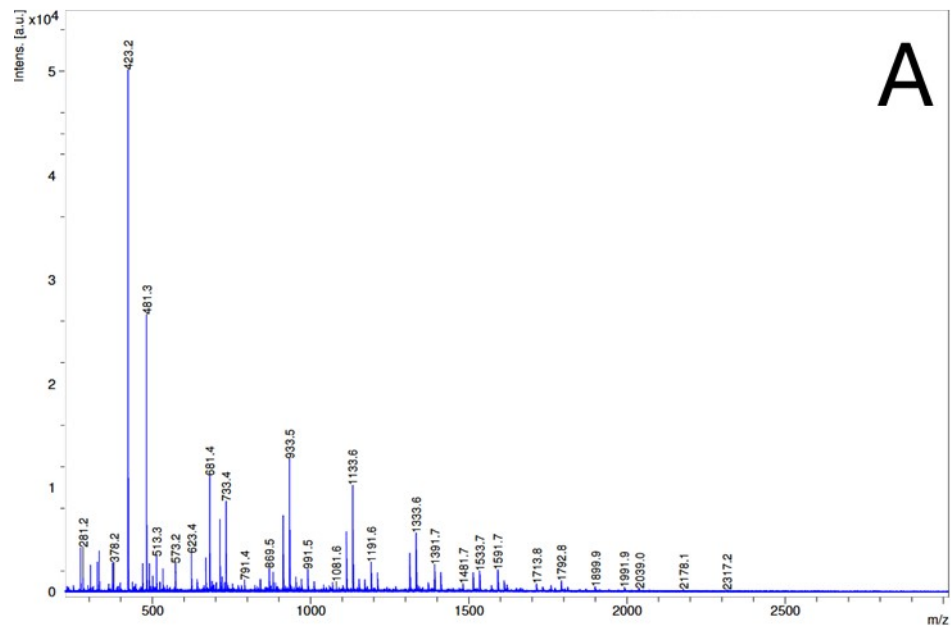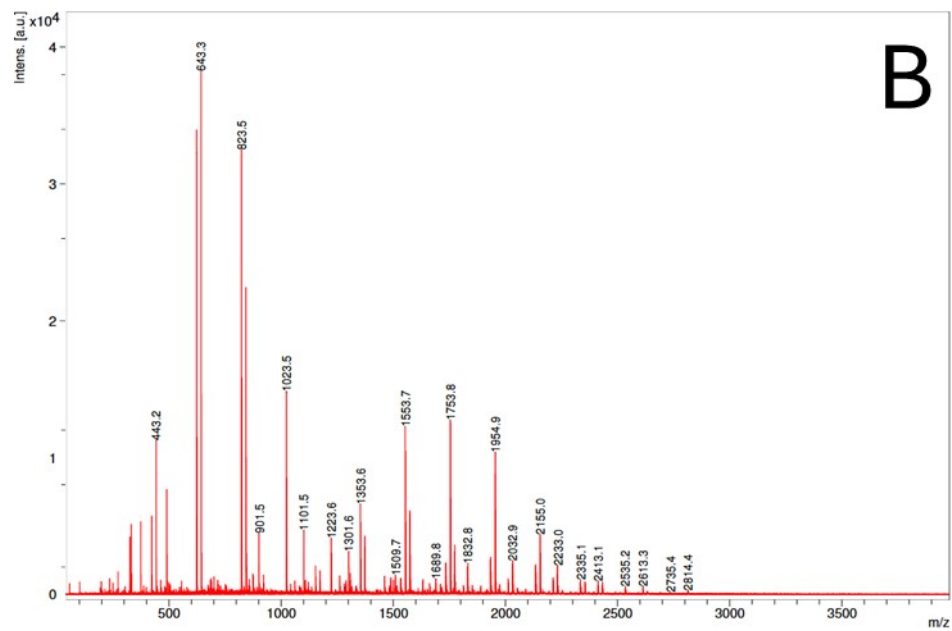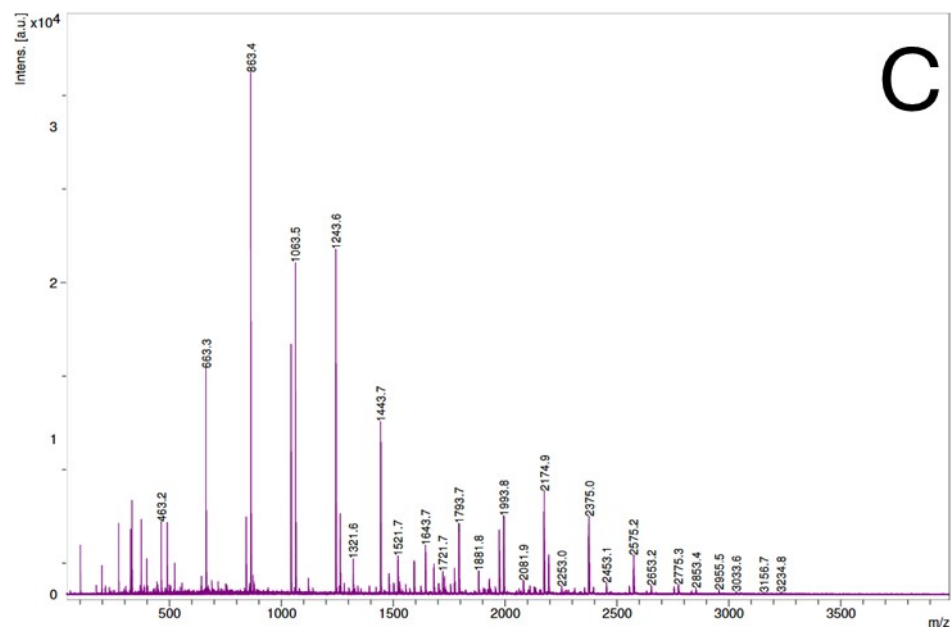

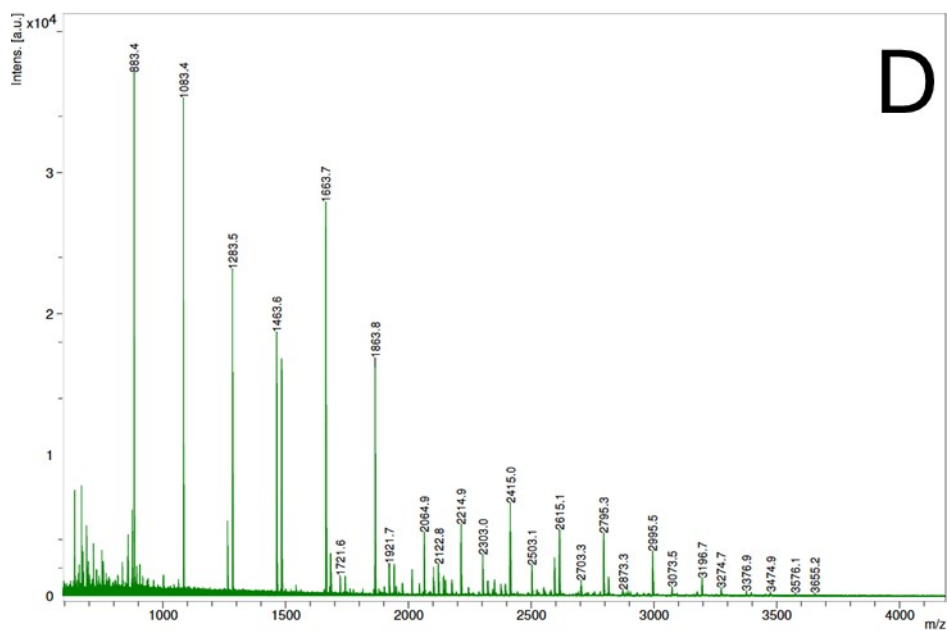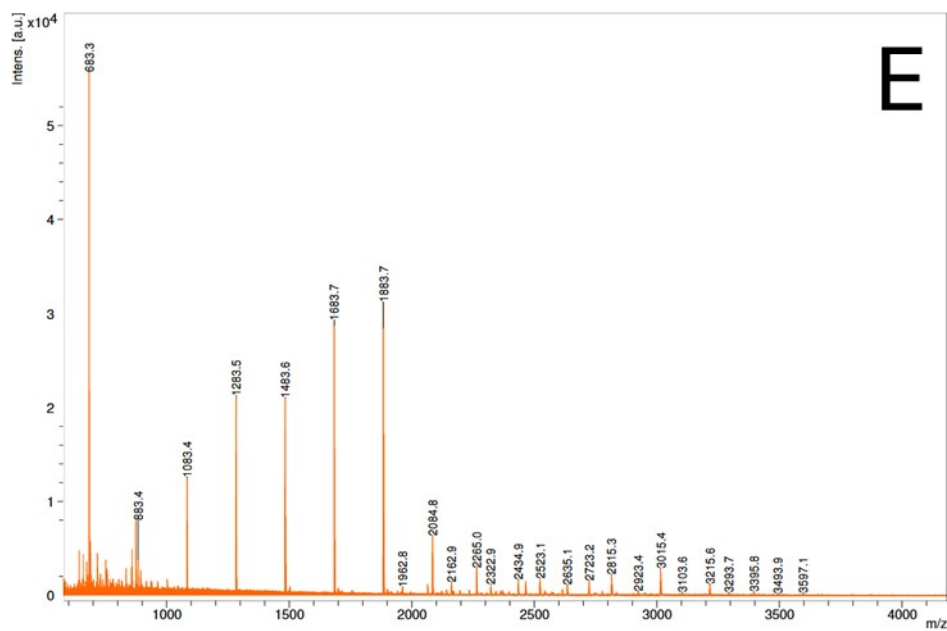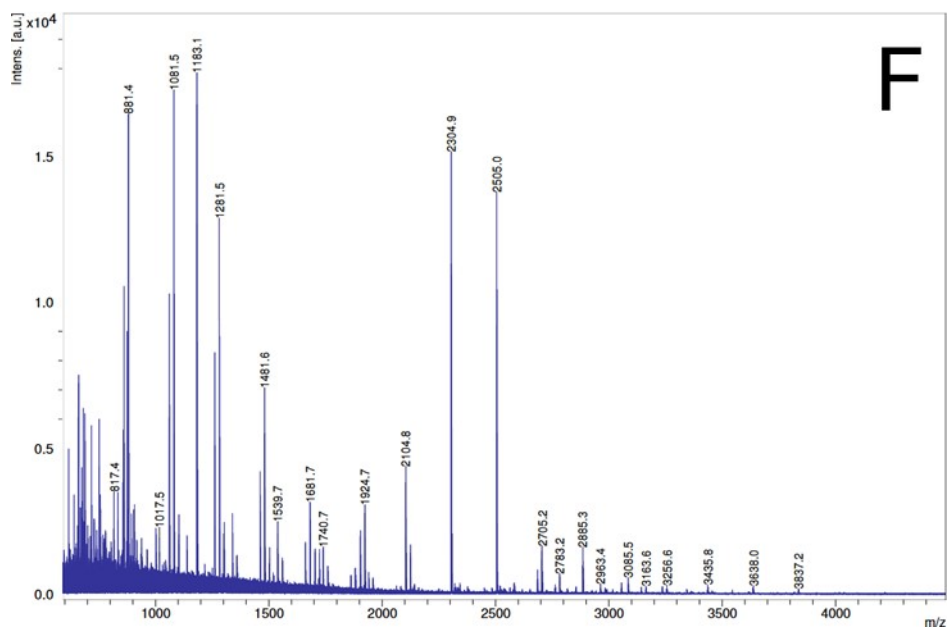

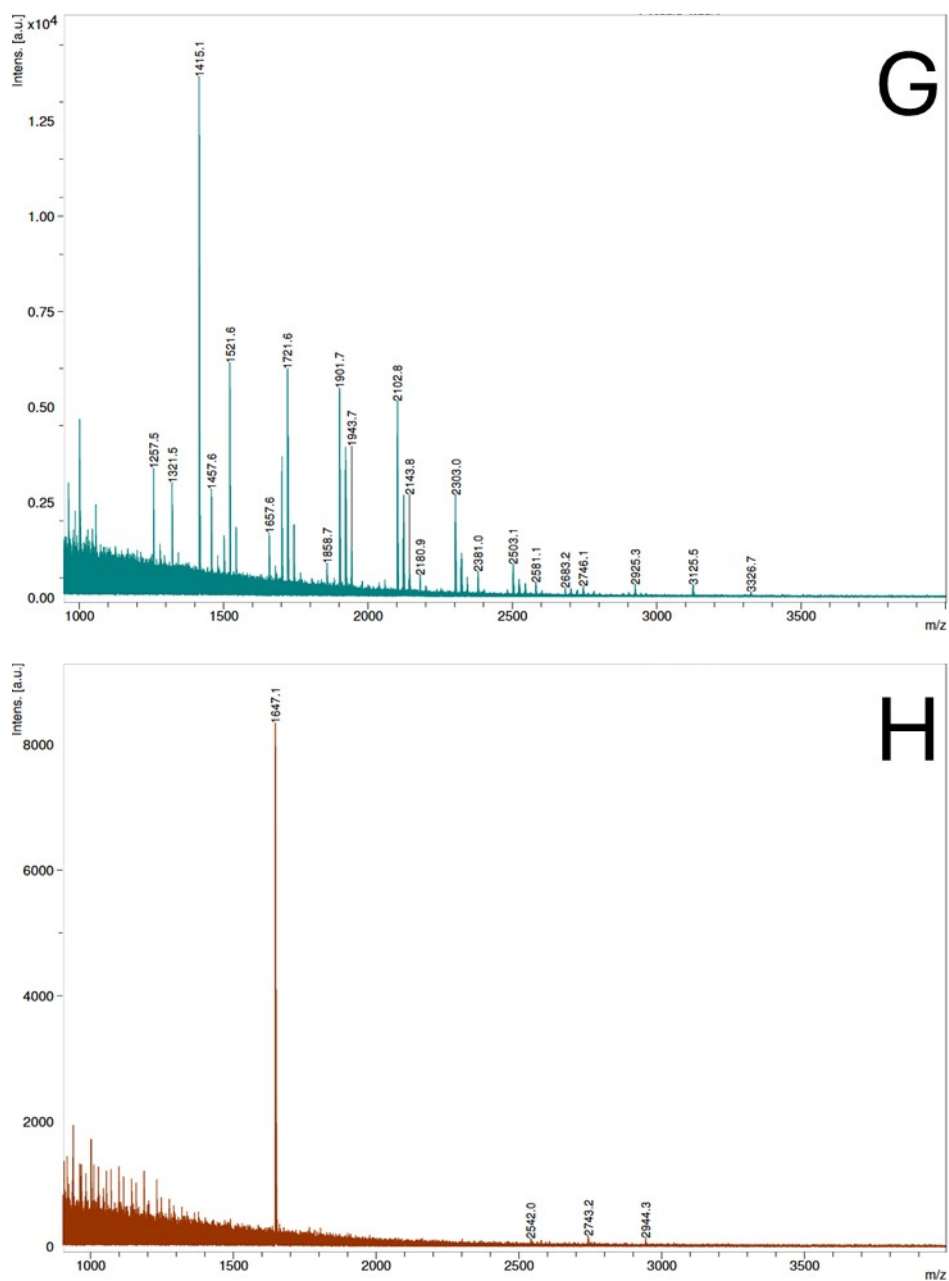

**Supplementary Fig. S2:** MALDI-TOF/TOF spectrum of NP-PBAT-Olig chromatography peaks 1(A), 2(B), 3(C), 4(D), 5(E), 6(F), 7(G), and 8 (H).



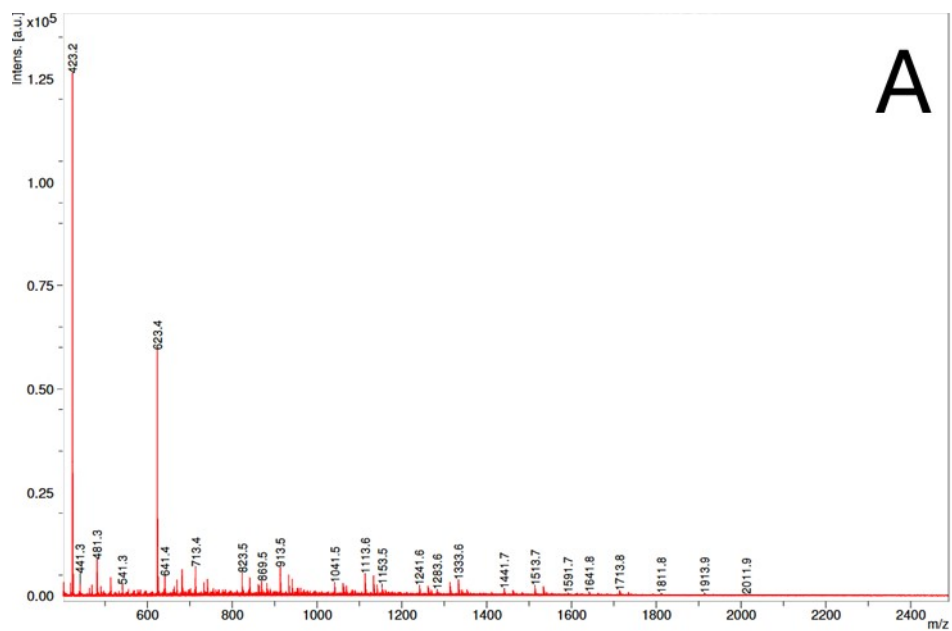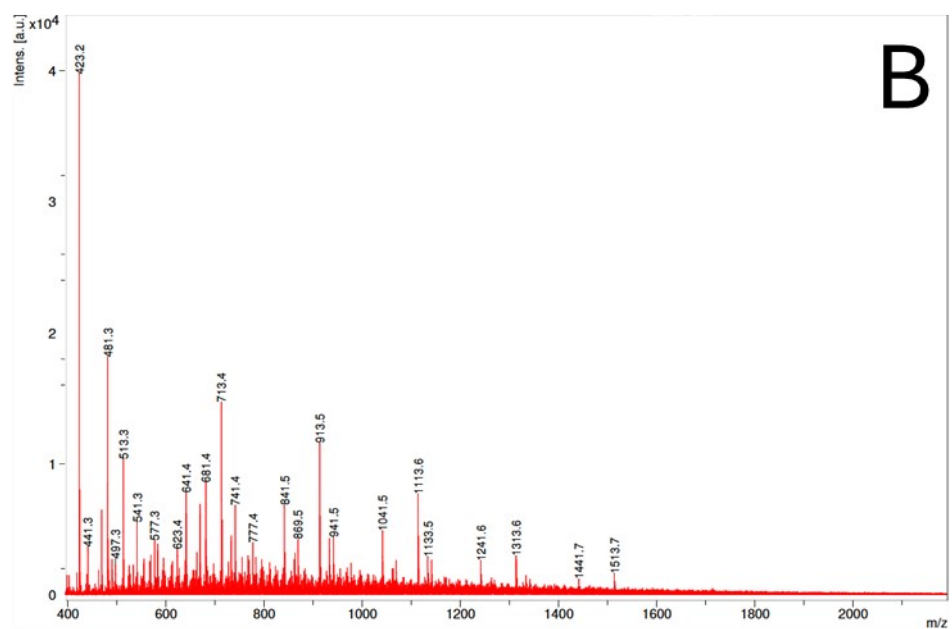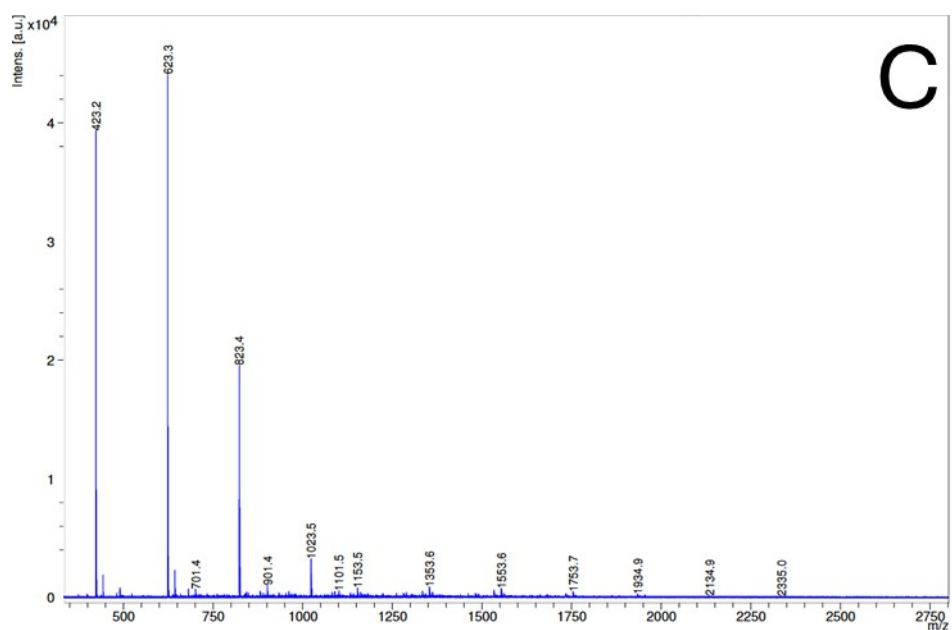

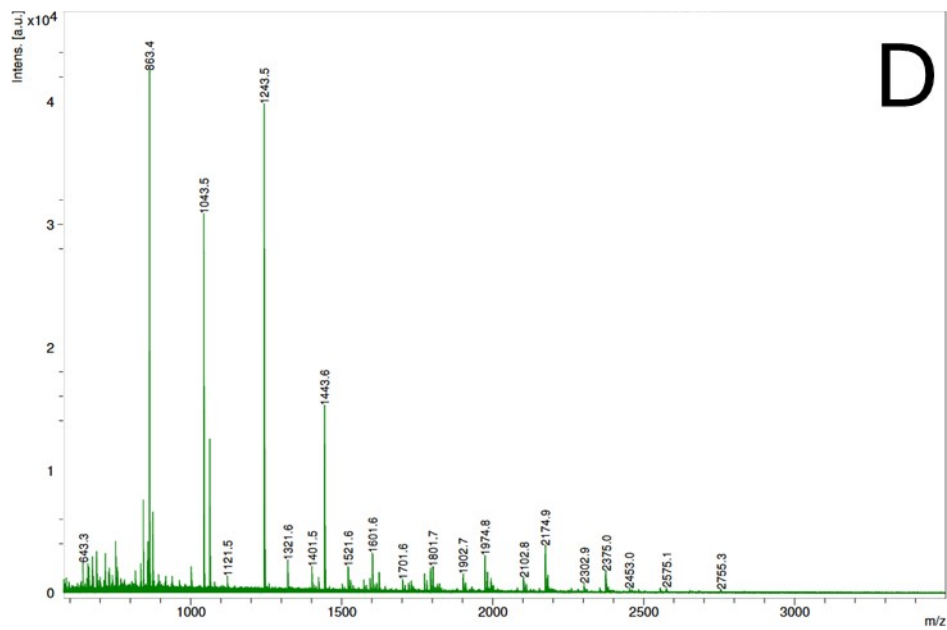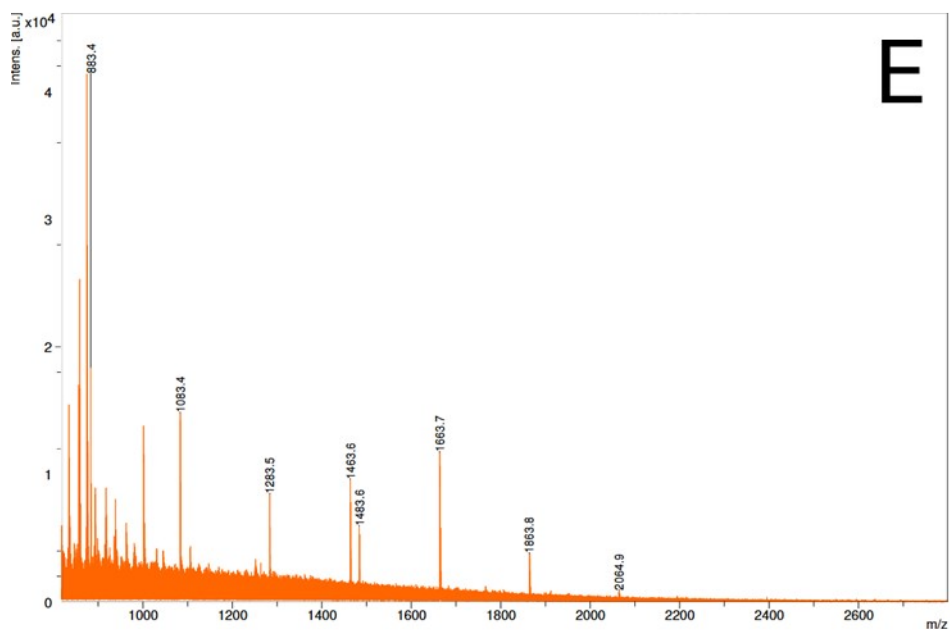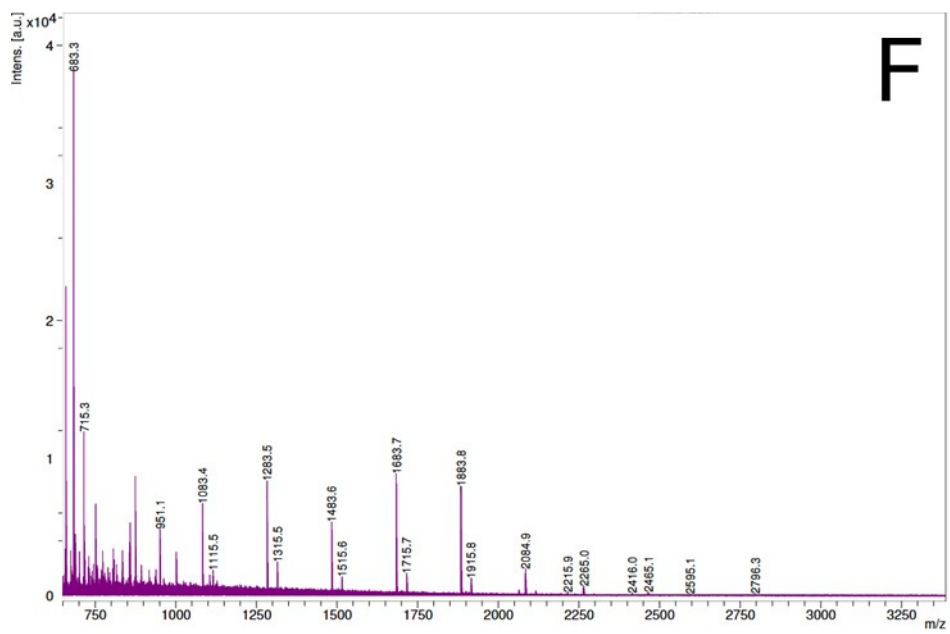

**Supplementary Fig. S3:** MALDI-TOF/TOF spectrum of P-PBAT-Olig chromatography peaks 1(A) 2(B), 3(C), 4(D), 5(E), and 6(F).

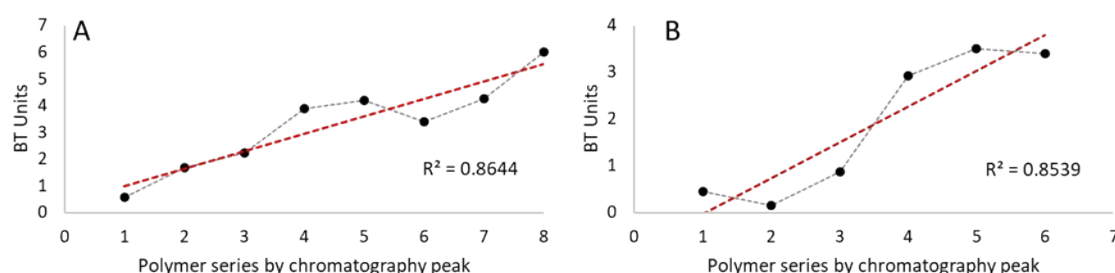

**Supplementary Fig. S4:** Mean value of butylene-terephthalate units per polymeric series by chromatography peak (from lower to higher hydrophobicity) of NP- (A) and P- (B) PBAT-Olig.

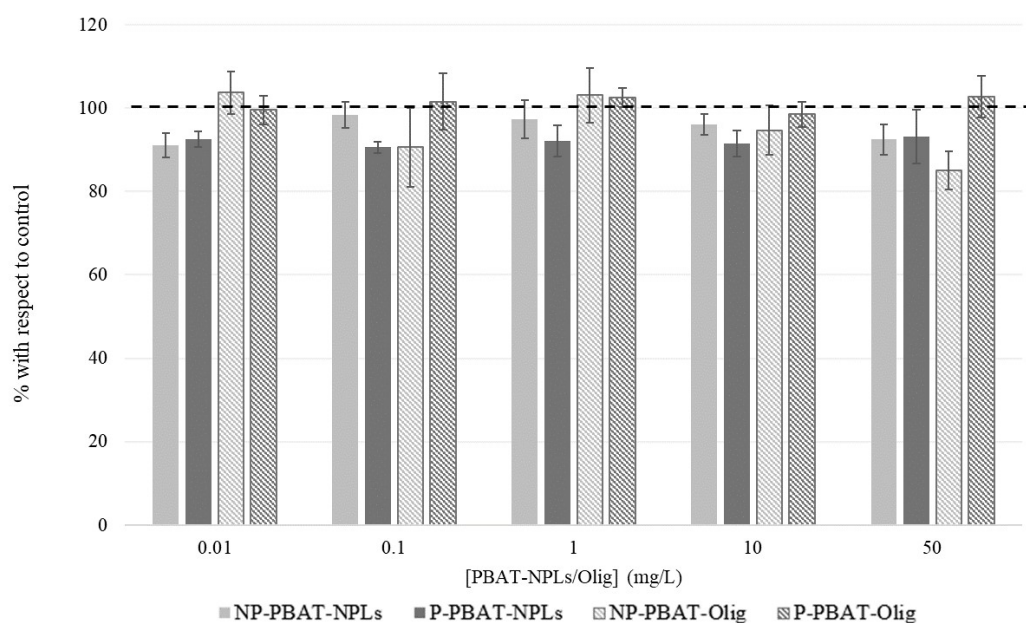

**Supplementary Fig. S5:** Growth, expressed as percentage of variation of OD<sub>750</sub>, on *C. reinhardtii* after 72 h exposure to NP/P-PBAT-NPLs & NP/P-PBAT-Olig. Asterisks indicate treatments that are significantly different (Dunnet's test, (\*\*\*)  $p < 0.001$ .; (\*\*)  $p < 0.01$ .; (\*)  $p < 0.05$ .) from the control represented as 100 % (dot line).

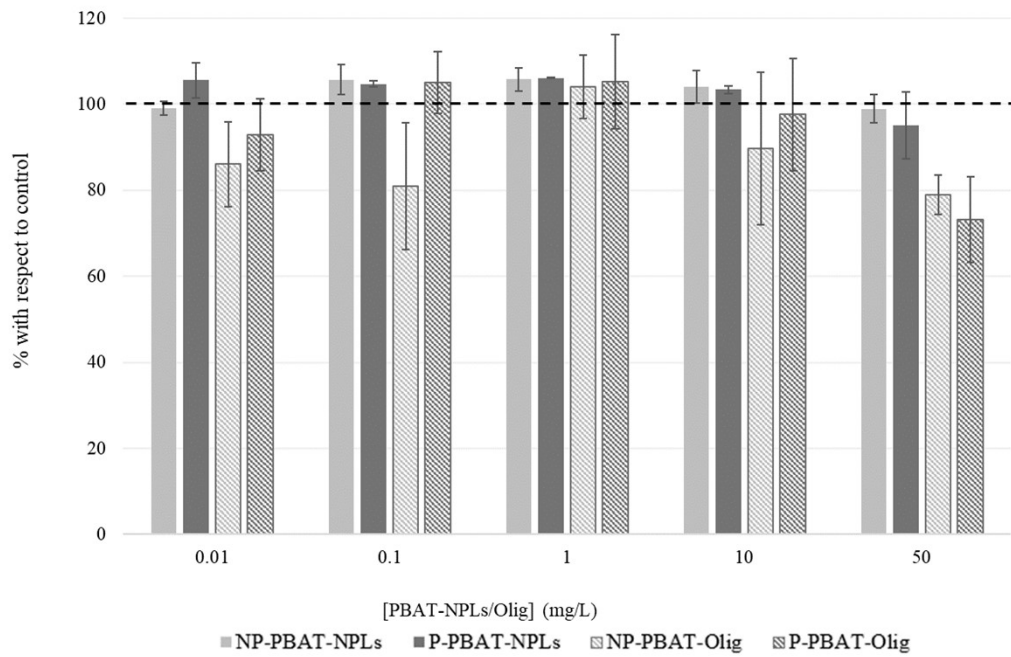

Sup

**plementary Fig. S6:** Chlorophyll content expressed as percentage of variation of total chlorophylls on *C. reinhardtii* after 72 h exposure to NP/P-PBAT-NPLs & NP/P-PBAT-Olig. Asterisks indicate treatments that are significantly different (Dunnet's test, (\*\*\*)  $p < 0.001$ .; (\*\*)  $p < 0.01$ .; (\*)  $p < 0.05$ .) from the control represented as 100 % (dot line).

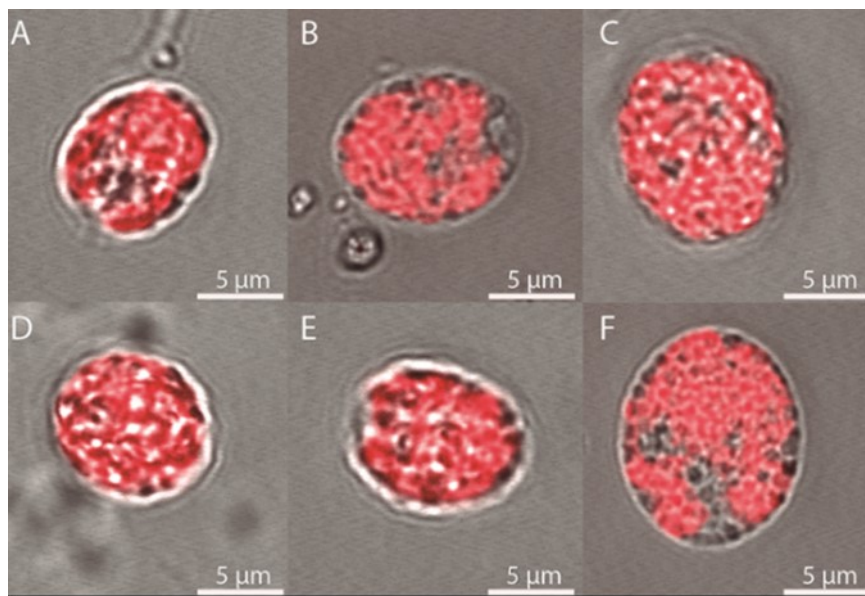

**Supplementary Fig. S7:** Representative chlorophyll autofluorescence/bright field overlay images of confocal microscopy of *C. reinhardtii* after 72 h exposure to NP- and P-PBAT-NPLs. Image shows confocal microscopy images of the non-exposed cells (A

and D); cells exposed to 0.1 and 10 mg/L of NP-PBAT-NPLs (B and C, respectively); cells exposed to 0.1 and 10 mg/L of P-PBAT-NPLs (E and F, respectively).
